# Supplementary material
Source: publisher site journal article supplement (https://www.dovepress.com/article/418802)
Supplement: Supplementary file 1 [file get_supplementary_file.php]

| **Asthma symptom control** | | | |
| --- | --- | --- | --- |
| **In the last 4 weeks, has the patient had:** | **Well controled** | **Partly controlled** | **Uncontrolled** |
| Asthma symptoms in daytime, more than twice a week? | None of these | 1-2 of these | 3-4 of these |
| Any night waking due to asthma? |
| Reliever needed more than twice a week? |
| Any activity limitation due to asthma? |

**Supplementary table 1.** GINA 2014 assessment of asthma control in adults, adolescents, and children 6-11 years old.

**Supplementary Table 2.** Inhaled corticosteroids daily doses in adults according to GINA guidelines 2014.

| **GINA 2014** | | | |
| --- | --- | --- | --- |
| **Drug** | **Daily dose (mcg)** | | |
|  | **Low** | **Medium** | **High** |
| Beclometasone dipropionate (CFC) | 200-500 | >500-1000 | >1000 |
| Beclometasone dipropionate (HFA) | 100-200 | >200-400 | >400 |
| Budesonide (DPI) | 200-400 | >400-800 | >800 |
| Ciclesonide (HFA) | 80-160 | >160-320 | >320 |
| Fluticasone propionate (DPI) | 100-250 | >250-500 | >500 |
| Fluticasone propionate (HFA) | 100-250 | >250-500 | >500 |
| Mometasone furoate | 110-220 | >220-440 | >440 |
| Triamcinolone acetonide | 400-1000 | >1000-2000 | >2000 |

HFA – hydrofluoroalkane propellant; pMDI – pressurized metered-dose inhaler.

**Supplementary table 3.** Logistic regression in Asthma group

| **Variable*** | **Time** | **Sig.** | **Exp(B)** | **95% C.I. EXP(B)** | |
| --- | --- | --- | --- | --- | --- |
| **Low** | **Upper** |
| High dose of ICS | t0 | 0.279 | 0.362 | 0.057 | 2.281 |
| Short term of OCS | 0.284 | 0.423 | 0.088 | 2.039 |
| LTRA use | 1.000 | 3521.000 | 0.000 | 0.000 |
| High dose of ICS | t1 | 0.221 | 2.251 | 0.614 | 8.256 |
| Short term of OCS | 0.483 | 0.446 | 0.047 | 4.270 |
| LTRA use | 0.454 | 2.217 | 0.276 | 17.803 |
| High dose of ICS | t2 | 0.831 | 0.883 | 0.283 | 2.760 |
| Short term of OCS | 0.077 | 0.234 | 0.047 | 1.168 |
| LTRA use | 0.999 | 0.000 | 0.000 | 0.000 |
| High dose of ICS | t3 | 0.612 | 0.731 | 0.217 | 2.458 |
| Short term of OCS | 0.180 | 0.200 | 0.019 | 2.101 |
| LTRA use | 0.251 | 3.952 | 0.378 | 41.364 |

*Results adjusted by gender.

ICS- Inhaled corticosteroids; OCS- Oral Corticosteroid; LTRA- LTRA, leukotriene receptor antagonists

| Name | | | | |
| --- | --- | --- | --- | --- |
| File ID | | | | |
| Date of Birth Telephone number | | | | |
| Gender | | | | |
| File analysis date | | | | |
|  | Baseline | 12 months | 24 months | 36 months |
| Age |  |  |  |  |
| **Variable** |  |  |  |  |
| FVC L |  |  |  |  |
| FVC % |  |  |  |  |
| FEV1 L |  |  |  |  |
| FEV1 % |  |  |  |  |
| FVC/FEV1 % |  |  |  |  |
| Reversibility test % |  |  |  |  |
| Obstruction |  |  |  |  |
| Eosinophils (#) |  |  |  |  |
| IgE (ku/L) |  |  |  |  |
| Oral corticosteroid for 6 months 1= Yes, 0= No |  |  |  |  |
| Steroid cycle 1= Yes, 0= No |  |  |  |  |
| How many cycles are used by year? |  |  |  |  |
| Use of Antileukotrienes? 1= Yes, 0= No |  |  |  |  |
| Use of SABA? (Rescue)  1= Yes, 0= No |  |  |  |  |
| Annotations | | | | |

**Supplementary Figure 1.** Case report format

**Abbreviations:** ID, identification; FVC, forced vital capacity; FEV1, forced expiratory volume in the first second; IgE, immunoglobulin E; SABA, short-acting beta2-agonist.


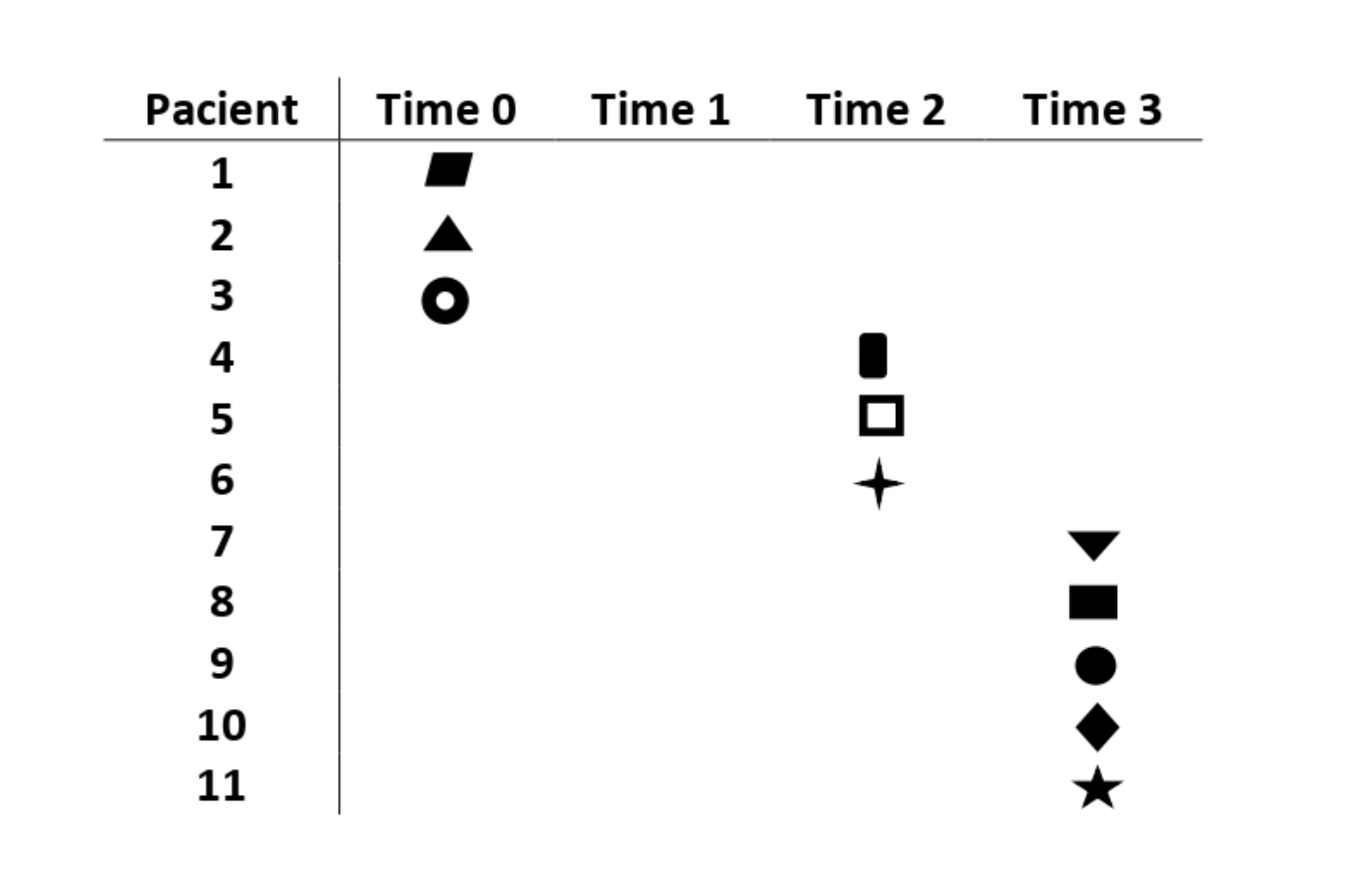
 **Supplementary Figure 2.** Asthma patients with STEP-4.
